# Supplementary material for: BRCA1/2 carriers: their childbearing plans and theoretical intentions about having preimplantation genetic diagnosis and prenatal diagnosis
Source: PubMed Central journal article supplement — Genet Med. 2012 Jan 12;14(5):527–34. doi: 10.1038/gim.2011.27 (PMC4088944; doi:10.1038/gim.2011.27), 2012-01-12
Supplement: gim201127x1.pdf [file gim201127x1.pdf]

Supplementary data: Table: Attitudes to PGD/PND being proposed to *BRCA1/2* carriers: previous findings

| Article                       | Sample characteristics                                                                                                                                                                                                                                                                                                                                   | PGD                                                                                                                                                                                                                                                                                                                                                         | PND                                                                                                                                                                                                                                                                                      |
|-------------------------------|----------------------------------------------------------------------------------------------------------------------------------------------------------------------------------------------------------------------------------------------------------------------------------------------------------------------------------------------------------|-------------------------------------------------------------------------------------------------------------------------------------------------------------------------------------------------------------------------------------------------------------------------------------------------------------------------------------------------------------|------------------------------------------------------------------------------------------------------------------------------------------------------------------------------------------------------------------------------------------------------------------------------------------|
| Menon, U.<br>2007 (8)         | <ul style="list-style-type: none"> <li>- Response rate: 51% n*=52 / N*=102</li> <li>- Source population: 1 Family Cancer Clinic (UK)</li> <li>- <b>BRCA1/2 carriers (except for one participant)</b></li> <li>- Women only</li> <li>- Breast cancer: 50%</li> <li>- Mean age: 43 (range: 30-69)</li> <li>- Univariate analysis</li> </ul>                | <ul style="list-style-type: none"> <li>- 75% said it was acceptable to propose PGD to HBOC patients</li> <li>- 15 (37.5%) of the 40 who had completed their families would personally have considered having PGD if it had been available</li> <li>- 1 out of the 7 (13.4%) contemplating a future pregnancy said they would consider having PGD</li> </ul> | <ul style="list-style-type: none"> <li>- 5 (12.5%) out of the 40 who had completed their families would personally have considered having PND if it had been available</li> <li>- 1 out of the 7 (13.4%) contemplating a future pregnancy said they would consider having PND</li> </ul> |
| Staton, A.D.<br>2008 (12)     | <ul style="list-style-type: none"> <li>- Response rate: unknown (n=213)</li> <li>- Source population: a web-based population (USA)</li> <li>- <b>BRCA1/2 carriers</b></li> <li>- Women only</li> <li>- Breast cancer: 32%</li> <li>- Mean age: 34 years (range: 25-40)</li> <li>- Univariate analysis</li> </ul>                                         | <ul style="list-style-type: none"> <li>- 13% said they would be likely to consider having PGD because of a BRCA1/2 mutation</li> </ul>                                                                                                                                                                                                                      |                                                                                                                                                                                                                                                                                          |
| Fortuny, D.<br>2009 (7)       | <ul style="list-style-type: none"> <li>- Response rate: 86% (n=77 / N=89)</li> <li>- Source population: before BRCA1/2 testing (4 clinics in Spain)</li> <li>- <b>Carrier status: unknown</b></li> <li>- 67 women, 10 men</li> <li>- Cancer: 70%</li> <li>- Mean age: 42 ± 13.9 year ( SD)</li> <li>- Multivariate analysis</li> </ul>                   | <ul style="list-style-type: none"> <li>- 48% would consider having PGD if they were carriers</li> <li>- 63% (among those &gt;40 years of age)</li> </ul>                                                                                                                                                                                                    | <ul style="list-style-type: none"> <li>- 55% would consider having PND if they were carriers</li> <li>- 68% (among those over 40 years of age)</li> <li>- age was the only variable significantly associated with considering having PND (OR=3.13, p=0.003)</li> </ul>                   |
| Quinn, G.P.<br>2009 (13)      | <ul style="list-style-type: none"> <li>- Response rate: 54% (n=111/ N=205)</li> <li>- Source population: Conference attendees (USA)</li> <li>- <b>BRCA1/2 carriers: 70% others: 30%</b></li> <li>- Women only</li> <li>- Breast cancer: 29%</li> <li>- Ovarian cancer: 7%</li> <li>- &lt; 38 years of age: 19%</li> <li>- Univariate analysis</li> </ul> | <ul style="list-style-type: none"> <li>- 57% said PGD was an acceptable option (in high risk cases)</li> <li>- 33% would consider having PGD</li> <li>- 74%: information about PGD should be given</li> <li>- no predictive variables observed after group analysis depending on participants' reproductive plans</li> </ul>                                |                                                                                                                                                                                                                                                                                          |
| Vadaparampil, S.T<br>2009 (6) | <ul style="list-style-type: none"> <li>- Response rate unknown n=961</li> <li>- Source population: a web-based population (USA)</li> <li>- <b>BRCA1/2 carriers 49% ; non carriers: 35%, others 16%</b></li> <li>- Women only</li> </ul>                                                                                                                  | <ul style="list-style-type: none"> <li>- 33% said they would consider having PGD</li> <li>- After multivariate analysis, not wanting to have a child decreased the acceptability of PGD (OR=0.17)</li> </ul>                                                                                                                                                |                                                                                                                                                                                                                                                                                          |

|                         |                                                                                                                                                                                                                                                                                                                                                                                                                       |                                                                                        |  |
|-------------------------|-----------------------------------------------------------------------------------------------------------------------------------------------------------------------------------------------------------------------------------------------------------------------------------------------------------------------------------------------------------------------------------------------------------------------|----------------------------------------------------------------------------------------|--|
|                         | <ul style="list-style-type: none"> <li>- Breast cancer: 39.4% - Ovarian cancer: 17.5%</li> <li>- ≤ 41 years of age: n=650 (67.6%)</li> <li>- Multivariate analysis</li> </ul>                                                                                                                                                                                                                                         |                                                                                        |  |
| Quinn, G.P.<br>2010 (5) | <ul style="list-style-type: none"> <li>-- Response rate unknown (n=228)</li> <li>- Source population: a web-based population (USA)</li> <li>- <b>A heterogenous sample (including approximately 25 BRCA1/2 carriers)</b></li> <li>-Gender: men only</li> <li>-Breast cancer: n=7 (3.1%)</li> <li>-Prostate cancer: n=9 (3.9%)</li> <li>- ≤ 41 years of age: n=128 (56.1%)</li> <li>- Multivariate analysis</li> </ul> | -34% said they would consider having PGD (only overall percentages are presented here) |  |

\* n= total number of respondents N=total number of persons contacted for the survey
